# Supplementary material
Source: PubMed Central journal article supplement (PMC7042859)
Supplement: jama-323-444-s001.pdf [file jama-323-444-s001.pdf]

## Supplementary Online Content

Erlangsen A, Stenager E, Conwell Y, et al. Association between neurological disorders and death by suicide in Denmark. *JAMA*. doi:10.1001/jama.2019.21834

**eFigure 1.** Adjusted incidence rate ratio according to time since first diagnosis of dementia

**eTable 1.** List of examined neurological disorders

**eTable 2.** Distribution of suicides, person-years and incidence rates for study population

**eTable 3.** Adjusted incidence rate ratio of suicide in relation to period

**eTable 4.** Adjusted incidence rate ratio of suicide in relation to time since first diagnosis

This supplementary material has been provided by the authors to give readers additional information about their work.

## Supplementary Appendix

eFigure 1. Adjusted incidence rate ratio according to time since first diagnosis of dementia.<sup>a</sup>

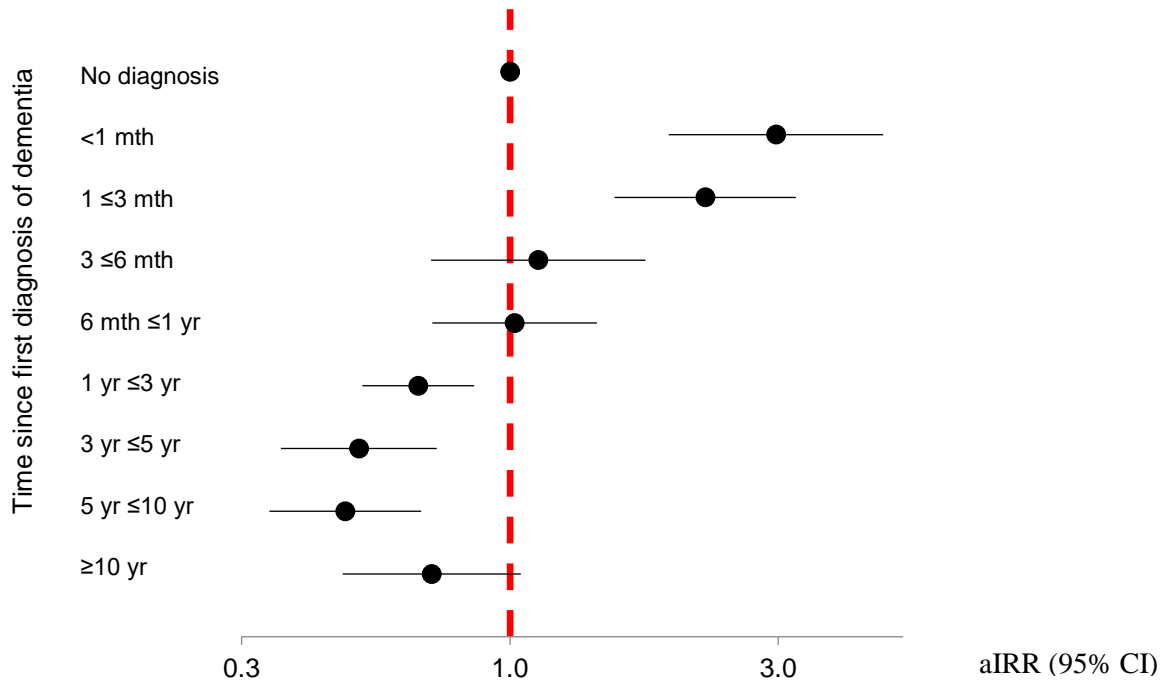

<sup>a</sup> Abbreviation: aIRR: adjusted incidence rate ratio. Adjusted for period, sex, age group, living status, region, socio-economic status, physical co-morbidity, psychiatric hospitalization prior to diagnosis of any neurological disorders, and deliberate self-harm prior to diagnosis of any neurological disorders. Error bars indicate 95% CIs.

eTable 1. List of examined neurological disorders.

| <b>Exposure</b>                                     | <b>ICD-8<sup>1</sup></b>       | <b>ICD-10<sup>2</sup></b>       |
|-----------------------------------------------------|--------------------------------|---------------------------------|
| Head injury                                         | 850.99; 800, 801, 803; 851-854 | S02.0, S02.1, S02.7, S02.9; S06 |
| Stroke                                              | 430-38                         | I61-I69                         |
| - Intracerebral haemorrhage                         | 431                            | I61                             |
| - Cerebral infarction                               | 433                            | I63                             |
| - Subarachnoid haemorrhage                          | 430                            | I60                             |
| Epilepsy                                            | 345                            | G40-G41                         |
| Polyneuropathy and peripheral neuropathy            | 250.05, 350-58                 | G60-G64                         |
| - Guillain Barre                                    |                                | G61.0                           |
| - Chronic inflammatory demyelinating polyneuropathy |                                | G61.8                           |
| Diseases of myoneural junction and muscle           | 341, 780-81, 756, 330          | G70-G73                         |
| - Myasthenia gravis                                 | 733.0.                         | G70                             |
| - Muscular dystrophy                                | 330.3                          | G71                             |
| Other brain disorders                               |                                | G44                             |
| Parkinson disease                                   | 342.99                         | G20-G22                         |
| Multiple sclerosis                                  | 340                            | G35 -37                         |
| CNS infections                                      | 320-324                        | G0-G09                          |
| Meningitis                                          | 320                            | G0-G3                           |
| Encephalitis                                        | 62-66, 323                     | G04-G05                         |
| Amyotrophic lateral sclerosis                       | 348                            | G12.2                           |
| Huntington disease                                  | 331.09                         | G10                             |
| Dementia                                            | 290.09, 290.18, 290.19         | F00-F03, G30                    |
| - Alzheimer disease                                 |                                | F00, G30                        |
| Intellectual disability                             | 311, 312, 313, 314, 315        | F70-F79                         |

1. *International Statistical Classification of Diseases and Related Health Problems*. 8th revision ed. Geneva: World Health Organisation; 1965.
2. *International Statistical Classification of Diseases and Related Health Problems*. 10th revision ed. Geneva: World Health Organization; 2007.

eTable 2. Distribution of suicides, person-years and incidence rates for study population.

|                       | People with neurological disorders |              |                     | People without neurological disorders |              |                  |
|-----------------------|------------------------------------|--------------|---------------------|---------------------------------------|--------------|------------------|
|                       | N                                  | Person-years | IR [CI 95%]         | N                                     | Person-years | IR [CI 95%]      |
| <b>Gender:</b>        |                                    |              |                     |                                       |              |                  |
| Male                  | 3,696                              | 6,411,983    | 57.6 (55.8-59.5)    | 20,231                                | 73,085,363   | 27.7 (27.3-28.1) |
| Female                | 1,815                              | 6,117,767    | 29.7 (28.3-31.0)    | 9,741                                 | 76,320,120   | 12.8 (12.5-13.0) |
| <b>Period:</b>        |                                    |              |                     |                                       |              |                  |
| 1980-1989             | 1,733                              | 1,463,955    | 118.4 (112.8-124.0) | 12,957                                | 40,395,918   | 32.1 (31.5-32.6) |
| 1990-1999             | 1,471                              | 2,611,705    | 56.3 (53.4-59.2)    | 8,378                                 | 40,796,943   | 20.5 (20.1-21.0) |
| 2000-2009             | 1,348                              | 4,303,900    | 31.3 (29.6-33.0)    | 5,457                                 | 40,057,455   | 13.6 (13.3-14.0) |
| 2010-2016             | 959                                | 4,150,189    | 23.1 (21.6-24.6)    | 3,180                                 | 28,155,168   | 11.3 (10.9-11.7) |
| <b>Age group:</b>     |                                    |              |                     |                                       |              |                  |
| 15-29                 | 494                                | 2,908,812    | 17.0 (15.5-18.5)    | 3,570                                 | 36,577,083   | 9.8 (9.4-10.1)   |
| 30-39                 | 750                                | 1,764,021    | 42.5 (39.5-45.6)    | 4,559                                 | 26,592,578   | 17.1 (16.6-17.6) |
| 40-49                 | 1,028                              | 1,675,479    | 61.4 (57.6-65.1)    | 5,979                                 | 26,089,667   | 22.9 (22.3-23.5) |
| 50-59                 | 997                                | 1,687,216    | 59.1 (55.4-62.8)    | 5,720                                 | 22,690,421   | 25.2 (24.6-25.9) |
| 60-69                 | 909                                | 1,672,693    | 54.3 (50.8-57.9)    | 4,549                                 | 18,679,933   | 24.4 (23.6-25.1) |
| 70-79                 | 820                                | 1,532,985    | 53.5 (49.8-57.2)    | 3,476                                 | 12,473,122   | 27.9 (26.9-28.8) |
| 80-89                 | 445                                | 1,065,920    | 41.7 (37.9-45.6)    | 1,834                                 | 5,427,568    | 33.8 (32.2-35.3) |
| 90+                   | 68                                 | 222,624      | 30.5 (23.3-37.8)    | 285                                   | 875,111      | 32.6 (28.8-36.3) |
| <b>Living status:</b> |                                    |              |                     |                                       |              |                  |
| Alone                 | 3,437                              | 5,753,032    | 59.7 (57.7-61.7)    | 16,586                                | 50,726,038   | 32.7 (32.2-33.2) |
| Cohabiting/married    | 2,072                              | 6,768,041    | 30.6 (29.3-31.9)    | 13,353                                | 97,503,331   | 13.7 (13.5-13.9) |
| Missing <sup>a</sup>  | <4                                 | 8,677        | NA                  | 33                                    | 1,176,114    | 2.8 (1.8-3.8)    |
| <b>Region:</b>        |                                    |              |                     |                                       |              |                  |
| Capital               | 1,948                              | 3,781,769    | 51.5 (49.2-53.8)    | 9,956                                 | 46,957,633   | 21.2 (20.8-21.6) |
| Zealand               | 883                                | 2,220,152    | 39.8 (37.1-42.4)    | 4,595                                 | 21,393,807   | 21.5 (20.9-22.1) |
| Southern Denmark      | 1,135                              | 2,715,112    | 41.8 (39.4-44.2)    | 6,795                                 | 33,840,310   | 20.1 (19.6-20.6) |
| Central Jutland       | 1,124                              | 2,736,227    | 41.1 (38.7-43.5)    | 5,978                                 | 33,186,564   | 18.0 (17.6-18.5) |

|                                          |              |                   |                         |               |                    |                         |
|------------------------------------------|--------------|-------------------|-------------------------|---------------|--------------------|-------------------------|
| Northern Jutland                         | 421          | 1,076,489         | 39.1 (35.4-42.8)        | 2,648         | 14,027,168         | 18.9 (18.2-19.6)        |
| <b>Socio economic status:</b>            |              |                   |                         |               |                    |                         |
| Working                                  | 788          | 4,874,161         | 16.2 (15.0-17.3)        | 4,483         | 57,971,358         | 7.7 (7.5-8.0)           |
| Unemployed                               | 803          | 1,407,421         | 57.1 (53.1-61.0)        | 1,908         | 4,097,534          | 46.6 (44.5-48.7)        |
| Retired, disability pension              | 66           | 210,881           | 31.3 (23.7-38.8)        | 386           | 3,056,770          | 12.6 (11.4-13.9)        |
| Under education                          | 783          | 3,270,165         | 23.9 (22.3-25.6)        | 3,526         | 22,936,586         | 15.4 (14.9-15.9)        |
| Data not available <sup>b</sup>          | 2,099        | 1,898,246         | 110.6 (105.8-115.3)     | 15,004        | 48,561,545         | 30.9 (30.4-31.4)        |
| Missing                                  | 972          | 868,875           | 111.9 (104.8-118.9)     | 4,665         | 12,781,691         | 36.5 (35.5-37.5)        |
| <b>Charlton Comorbidity Index:</b>       |              |                   |                         |               |                    |                         |
| No disorder                              | 3,279        | 8,483,567         | 38.7 (37.3-40.0)        | 24,503        | 133,618,763        | 18.3 (18.1-18.6)        |
| 1-3 disorders                            | 2,096        | 3,828,362         | 54.7 (52.4-57.1)        | 5,111         | 15,137,523         | 33.8 (32.8-34.7)        |
| 4+ disorders                             | 136          | 217,820           | 62.4 (51.9-72.9)        | 358           | 649,197            | 55.1 (49.4-60.9)        |
| <b>History of psychiatric diagnosis:</b> |              |                   |                         |               |                    |                         |
| None                                     | 3,970        | 11,495,201        | 34.5 (33.5-35.6)        | 19,339        | 141,264,471        | 13.7 (13.5-13.9)        |
| Depression                               | 925          | 715,409           | 129.3 (121.0-137.6)     | 5,286         | 5,347,860          | 98.8 (96.2-101.5)       |
| Other mental disorder                    | 3,970        | 11,495,201        | 193.0 (177.8-208.3)     | 5,347         | 2,793,152          | 191.4 (186.3-196.6)     |
| <b>History of deliberate self-harm:</b>  |              |                   |                         |               |                    |                         |
| None                                     | 4,840        | 12,303,798        | 39.3 (38.2-40.4)        | 24,356        | 147,870,152        | 16.5 (16.3-16.7)        |
| Previous self-harm                       | 671          | 225,951           | 297.0 (274.5-319.4)     | 5,616         | 1,535,331          | 365.8 (356.2-375.4)     |
| <b>Total</b>                             | <b>5,511</b> | <b>12,529,750</b> | <b>44.0 (42.8-45.1)</b> | <b>29,972</b> | <b>149,405,483</b> | <b>20.1 (19.8-20.3)</b> |

Abbreviation: IR: incidence rate per 100,000 person-years.

<sup>a</sup> Given that only few the individuals with missing data concerning living status died by suicide, it was decided to merge this group with those co-habiting/married.

<sup>b</sup> Socio-economic status was first available from 1992 onwards.

eTable 3. Adjusted incidence rate ratio of suicide in relation to period.

|                                           | 1980-1999 |                   |                                 | 2000-2016 |                   |                                 |
|-------------------------------------------|-----------|-------------------|---------------------------------|-----------|-------------------|---------------------------------|
|                                           | <i>n</i>  | IR per 100,000 PY | Full aIRR <sup>a</sup> (95% CI) | <i>n</i>  | IR per 100,000 PY | Full aIRR <sup>a</sup> (95% CI) |
| Neurological disorders                    | 3,204     | 78.6              | 1.4 (1.3-1.5)                   | 2,307     | 27.3              | [Reference]                     |
| No neurological disorders                 | 21,335    | 26.3              | 0.7 (0.7-0.8)                   | 8,637     | 12.7              | 0.6 (0.6-0.7)                   |
| Dementia                                  | 377       | 117.3             | 2.4 (2.0-2.9)                   | 192       | 28.9              | [Reference]                     |
| Multiple sclerosis                        | 91        | 75.6              | 2.0 (1.5-2.8)                   | 61        | 22.0              | [Reference]                     |
| Polyneuropathy and periferel neuropathy   | 534       | 79.8              | 1.5 (1.3-1.8)                   | 326       | 34.0              | [Reference]                     |
| Diseases of myoneural junction and muscle | 736       | 93.8              | 1.5 (1.3-1.7)                   | 225       | 18.8              | [Reference]                     |
| Meningitis                                | 31        | 48.5              | 1.5 (0.9-2.6)                   | 26        | 16.1              | [Reference]                     |
| Head injury                               | 437       | 76.8              | 1.4 (1.3-1.6)                   | 1,155     | 30.3              | [Reference]                     |
| Epilepsy                                  | 578       | 81.8              | 1.4 (1.3-1.6)                   | 470       | 32.6              | [Reference]                     |
| CNS infections                            | 66        | 58.8              | 1.4 (1.0-2.0)                   | 51        | 20.2              | [Reference]                     |
| Parkinson disease                         | 119       | 102.5             | 1.3 (1.0-1.8)                   | 73        | 48.5              | [Reference]                     |
| Subarachnoid haemorrhage                  | 80        | 88.2              | 1.3 (0.8-1.9)                   | 31        | 37.2              | [Reference]                     |
| Stroke                                    | 937       | 72.0              | 1.2 (1.0-1.4)                   | 298       | 34.0              | [Reference]                     |
| Traumatic stroke                          | 45        | 58.7              | 1.2 (0.8-2.0)                   | 26        | 26.2              | [Reference]                     |
| Thrombosis cerebri                        | 81        | 88.4              | 1.2 (0.7-1.8)                   | 25        | 30.5              | [Reference]                     |
| Intellectual disabilities                 | 31        | 28.1              | 0.9 (0.6-1.3)                   | 65        | 21.2              | [Reference]                     |
| Encephalitis                              | 30        | 58.6              | 0.9 (0.5-1.5)                   | 23        | 27.9              | [Reference]                     |

Abbreviations: IR: incidence rate per 100,000 person-years; aIRR: adjusted incidence rate ratio; CNS infection: central nervous system infection.

<sup>a</sup> Adjusted for period, sex, age group, living status, region, socio-economic status, physical co-morbidity, psychiatric hospitalization prior to diagnosis of any neurological disorders, and deliberate self-harm prior to diagnosis of any neurological disorders. Estimates for people with no disorders were only reported for the model examining neurological disorders in general.

eTable 4. Adjusted incidence rate ratio of suicide in relation to time since first diagnosis.

|                                   | n      | Person-years | IR    | Full aIRR <sup>a</sup><br>(95% CI) |
|-----------------------------------|--------|--------------|-------|------------------------------------|
| <b>Time since first diagnosis</b> |        |              |       |                                    |
| <i>None</i>                       | 29,972 | 149,405,483  | 20.1  | [Reference]                        |
| <i>&lt;1 mth</i>                  | 1,286  | 1,523,115    | 84.4  | 3.0 (2.8-3.1)                      |
| <i>1 ≤3 mth</i>                   | 174    | 147,115      | 118.3 | 3.1 (2.7-3.6)                      |
| <i>3 ≤6 mth</i>                   | 191    | 218,232      | 87.5  | 2.3 (2.0-2.7)                      |
| <i>6 mth ≤1 yr</i>                | 317    | 421,702      | 75.2  | 2.0 (1.8-2.2)                      |
| <i>1 yr ≤3 yr</i>                 | 921    | 1,491,987    | 61.7  | 1.7 (1.6-1.9)                      |
| <i>3 yr ≤5 yr</i>                 | 586    | 1,345,659    | 43.5  | 1.3 (1.2-1.4)                      |
| <i>5 yr ≤10 yr</i>                | 933    | 2,560,711    | 36.4  | 1.3 (1.2-1.4)                      |
| <i>≥10 yr</i>                     | 1,103  | 4,821,227    | 22.9  | 1.5 (1.4-1.6)                      |

Abbreviations: IR: incidence rate per 100,000 person-years; aIRR: adjusted incidence rate ratio.

<sup>a</sup> Adjusted for period, sex, age group, living status, region, socio-economic status, physical co-morbidity, psychiatric hospitalization prior to diagnosis of any neurological disorders, and deliberate self-harm prior to diagnosis of any neurological disorders.
